# Supplementary material for: Influence of lamellar thickness on the transformation of isotactic polybutylene-1/carbon nanotube nanocomposites
Source: Royal Society of Chemistry journal article supplement (doi:10.1039/d0ce00112k), 2020-01-01
Supplement: d0ce00112k1.pdf [file d0ce00112k1.pdf]

## Supporting information

### Influence of Lamellar Thickness on the Transformation in Isotactic Polybutylene-1/ Carbon Nanotube Nanocomposites

Yan-Kai Li<sup>ab</sup>, Yu-Ge Wang<sup>ab</sup>, Cui-Liu Fu<sup>ab</sup>, You-Liang Zhu<sup>ab</sup>, Zhan-Wei Li<sup>\*ab</sup>, Zhao-Yan Sun<sup>\*ab</sup>

<sup>a</sup>State Key Laboratory of Polymer Physics and Chemistry, Changchun Institute of Applied Chemistry, Chinese Academy of Sciences, Changchun, 130022, China

<sup>b</sup>University of Science and Technology of China, Hefei, 230026, China

#### SI.1. Isothermal crystallization kinetics for neat PB-1 and PB-1/CNT nanocomposites.

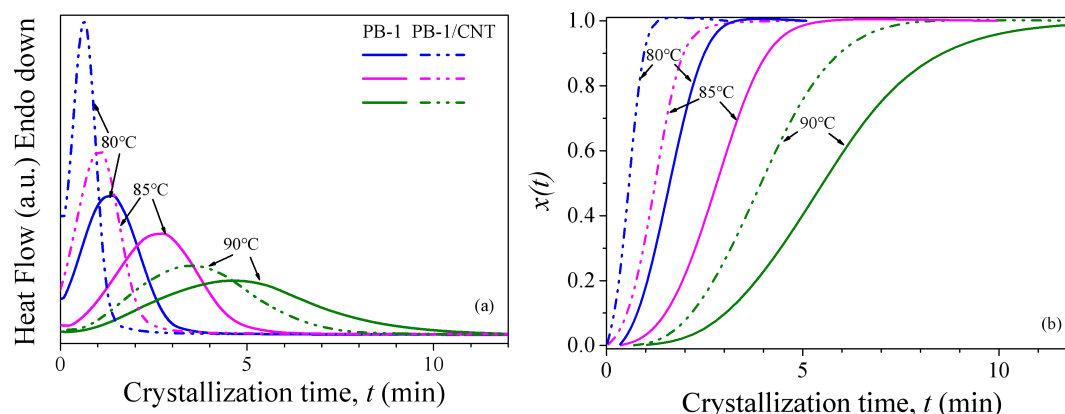

**Fig. S1** (a) DSC heat flow curves and (b) changes of relative crystallinity ( $x(t)$ ) as functions of crystallization time during isothermal crystallization at  $T_c = 90, 85, 80^\circ\text{C}$  for neat PB-1 (solid lines) and PB-1/CNT nanocomposites (dashed lines).

#### SI.2. Isothermal crystallization POM pictures of samples at 80°C.

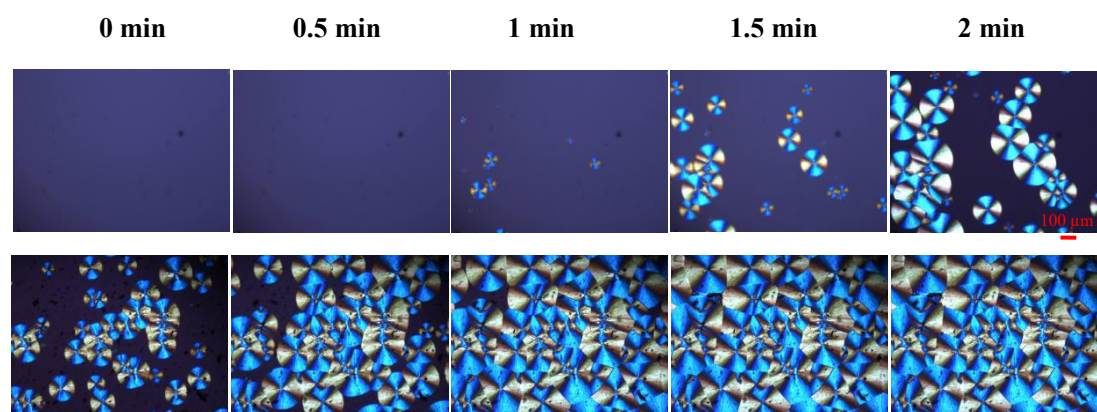

**Fig. S2** Selected POM pictures of neat PB-1 (top) and PB-1/CNT nanocomposites (bottom) during isothermal crystallization for different time at 80°C (the scale bar is 100  $\mu\text{m}$ ).

### SI.3. The transition mechanisms for neat PB-1 and PB-1/CNT nanocomposites.

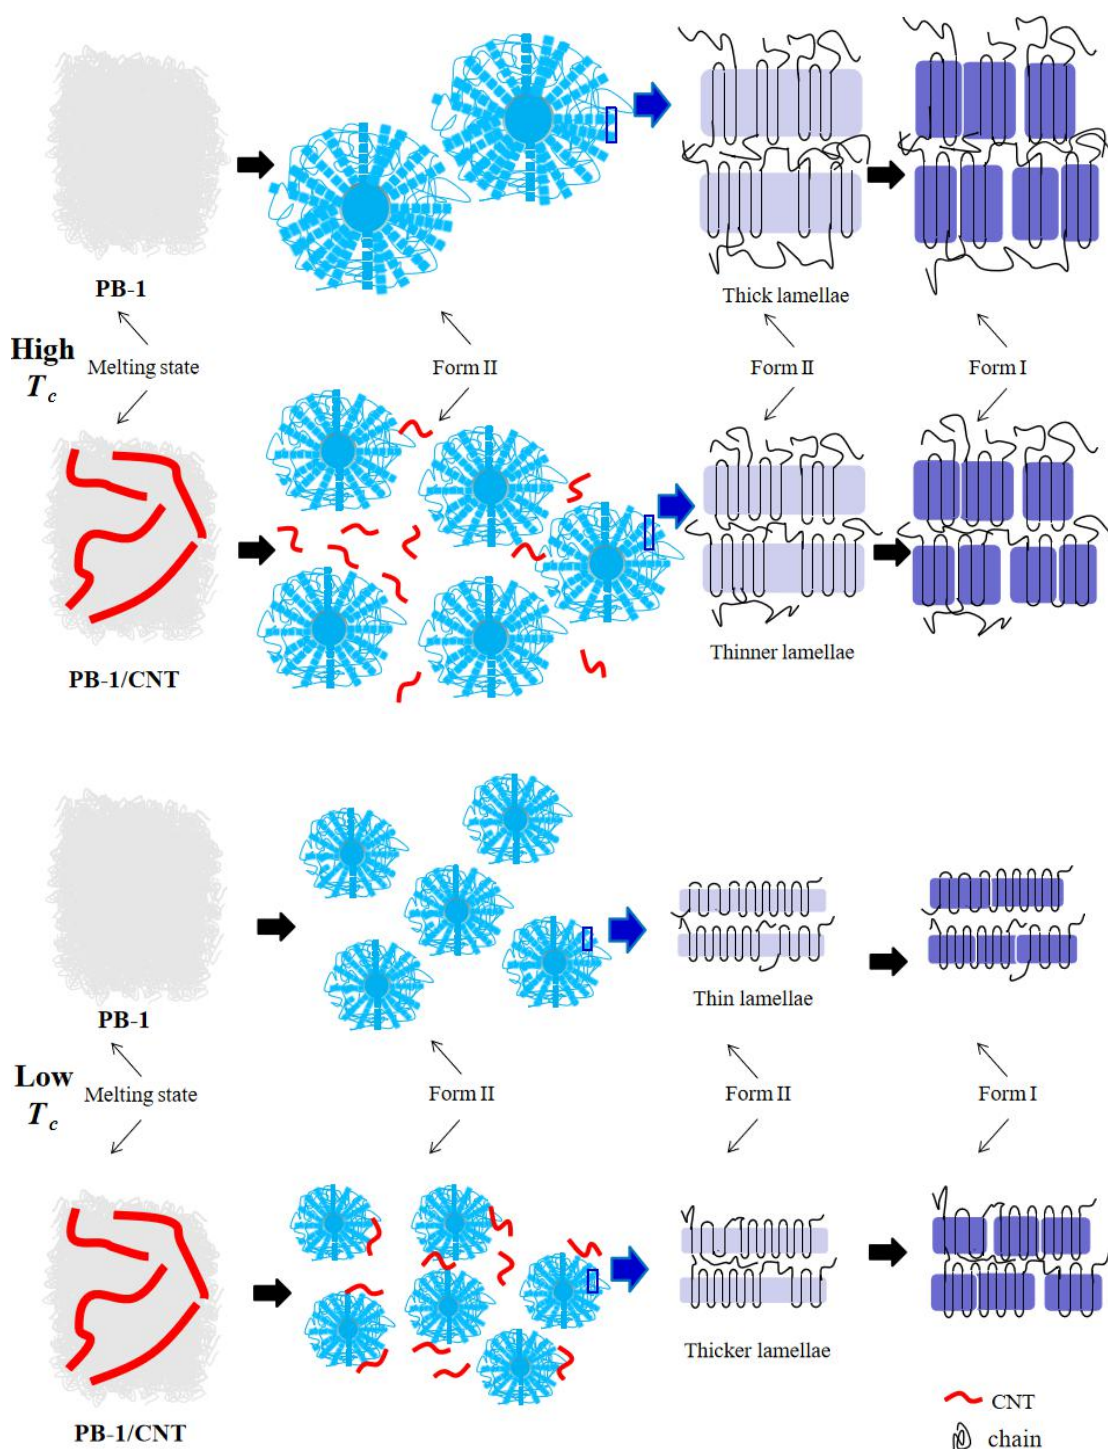

**Fig. S3** Schematic representation of transition for neat PB-1 and PB-1/CNT nanocomposites at high  $T_c$  (top) and low  $T_c$  (bottom).

Figure S3 shows the transition mechanisms at different  $T_c$ . The lamellar thickness in PB-1/CNT nanocomposites is thinner than that in neat PB-1 when  $T_c$  is higher than  $\sim 88^\circ\text{C}$ , while it is thicker when  $T_c$  is lower than  $\sim 88^\circ\text{C}$ .

Moreover, the spherulites of form II in PB-1/CNT nanocomposites are relatively denser and smaller in contrast with neat PB-1 at the same  $T_c$ . Besides, the number of chain folding decreases and the density of chain ends increases for thicker lamellae.
